# Supplementary material for: The Green Edge cruise: Understanding the onset, life and fate of the Arctic phytoplankton spring bloom
Source: Copernicus journal article supplement (doi:10.5194/essd-2022-41), 2022-02-21
Supplement: Supplementary file [file essd-2022-41-AC2-supplement.pdf]

## Answers to reviewer #1 (anonymous):

Authors are grateful for such a thorough review of our paper as we believe it will greatly improve the manuscript. We have revised the document and it will be proofread by several colleagues before final submission. Authors contributions have been modified to reflect on who wrote the paper.

### Responses to general comments

1. Confusion between cruise and ice-camp datasets and both published papers:

The first data description paper –published by Massicotte et al. in 2020 on the Green-Edge ice camp [<https://doi.org/10.5194/essd-12-151-2020>] was accompanied by a first dataset containing all the ice camp data, and some of the Amundsen cruise data (the bulk that was ready and processed at the time) [<https://doi.org/10.17882/59892>]. The reason for that is that we weren't aware a DOI could not be modified, consequently the plan was to add the rest of the cruise data to the same Massicotte et al. DOI on SEANOE. As soon as I (F. Bruyant) sent the cruise paper for publication to ESSD, I was immediately contacted by editor Dave Carlson about the confusion. We had a meeting (editor D. Carlson, editor K. Elger, P. Massicotte and F. Bruyant) and it was decided that the easiest solution would be to create an entirely separated dataset containing ONLY the cruise data with its own DOI [<https://doi.org/10.17882/86417>] in order to accompany the present paper [[essd-2022-41](https://doi.org/10.5194/essd-2022-41)]. The full dataset of Green Edge ice camp data remains unchanged as mentioned in Editor's comment #1 dated March 8<sup>th</sup> 2022. Furthermore, the cruise data set was momentarily published on the SEANOE website with a publication date as "2016". It has now been corrected for "2022". We have taken the appropriate steps towards appropriate citations of both datasets and both papers in the new version of the paper. We apologize for the confusion, and we hope it is now clarified.

2. List of publications using the Green Edge datasets:

This is an excellent suggestion. A table will be added to the revised manuscript.

3. Precision on data location:

Indeed, not all data is on SEANOE and some data is stored in more than one place. We will add a column to Table 3 to indicate where each parameter is to be found. We will also list all storage addresses in the "data availability statement".

### Detailed comments

I.72 Comma moved

I.74 We changed capitalization and verified throughout the document

I.75 Changed to “dataset” (and modified throughout)

I.76 Indeed, we corrected the document to reflect late spring / early summer.

I.77 The sentence now reads: “The dataset is available at <https://doi.org/10.17882/86417> (Bruyant et al., 2022)”, which is the dataset for the cruise. The list of references has also been modified accordingly.

I.81 Wording of the phrase changed to reflect on seasonality.

I.100 Space added

I.101 Capitalization modified. CCGS Amundsen cruise season is divided in successive legs of 6 weeks each. Legs are numbered sequentially throughout the season which usually runs from beginning of June to end of October - mid November. Each 6 weeks leg can be splitted in two parts (A and B) for logistics reasons which was the case for the Green Edge cruise. However, that same year Leg 2 started right after Green Edge on July 15<sup>th</sup> for 6 weeks. For everyone working regularly onboard the Amundsen (which is most of my co-authors), it was easier and far less confusing to stick with the conventional numbering of legs. Also some of us actually took part in Leg 2 that year, which was a totally different program.

I.126 The MVP is equipped with several sensors (CTD, C-Star and fluorometers). The subject of the phrase is “a moving vessel profiler”. We have modified the punctuation to clarify.

I.156 Changed to “presented”

I.163 Wording and punctuation modified

I.169 Changed to “e.g.”

I.203 Citation and reference list have been corrected.

I.209 Changed to “SBE 911plus”. We also checked the rest of the manuscript

I.232 Changed to “in situ”

I.249 Space removed

I.251 We have corrected the sentence and the reference list to cite Mueller et al. (2003) and Mobley (1999).

I.262 Changed to “Sea-Bird SBE 19plus”

I.268 We have verified the entire manuscript for unit format and subscripts as well when needed.

I. 295 The sentence now reads: “The DNA/RNA co-extraction was carried out using the AllPrep DNA/RNA kit (Qiagen).”

I.309 Elsewhere in the manuscript, stations are named without the letter G. We have adopted this semantic throughout the manuscript and explained that it effectively means Transect #, 1 digit then station #, 2 digits.

I.317 Changed to “Leg 1B”

I.343 We added the definition as “subsurface chlorophyll maximum”

I.391 Style has been made homogeneous

I.400 We have modified the phrasing to ensure more clarity.

I.414 Absolutely, the mention of Leg 1 was confusing. We have made the appropriate modifications

I.420 Agreed. This is unnecessary and the final reference will be added in the table listing all the papers based on our dataset.

I.427 Definition has been added in the text.

I.434 Please see answer to the comment on I.309.

I.557 This dataset is hosted on the polar data catalog (PDC). We contacted them to inquire about the proper way to cite their datasets as it seems that they are not giving DOIs. We will make the necessary changes in accordance with their answer.

I.558 the reference for Grasshoff et al. 1999 has been modified

#### Comments on Figures

Fig.1 Figure one’s resolution is 300 dpi, which is the requirement for publication in ESSD. However, we increased the font size, so labels and captions are easier to read. Panel B has been modified to account for the comment. Floats all lived a different number of days; the previous caption was an artifact of the period shown on the graphic, which is the same for all floats. We believe that indicating the ice-covered area on the map (especially with shading) would make the graph too hard to understand (especially with the 7 different positions of the ice edge to be represented. Instead, we modified the figure caption which now reads **“Colored lines indicate the position of the ice edge (sea ice concentration at 80%) on each transect at date of sampling; ice cover persisted on the western side of Baffin Bay, while the eastern side cleared earlier .”**.

Fig.3 and 4 Figures will be redone to reach 300 dpi.

Fig. 5 Yes, it would indeed make sense. However, the availability of the data is “as is”, meaning monthly averages. Daily averages are not available, consequently we cannot change the span of the data included in Fig.5. You can find the data here: <https://apps.ecmwf.int/datasets/data/interim-full-moda/levtype=sfc/>.

Fig.7 Transition from sea-ice covered to open water at a given geographic location is a process that takes a fair amount of time. Certainly, it takes several days for the ice pack to break and disperse, leaving the water covered in pieces of ice and slush. DOW is a calculated parameter describing a continuous lengthy process, and we feel that a change in colormap or an abrupt change at zero would be detrimental to the meaning of the graph. Also, at this stage in the paper, it has been mentioned several times that sea ice is located on the Canadian side and open water on the Greenland side.

Fig.10 Figure will be redone to reach 300 dpi.

Fig. 13 We have modified the figure caption for more clarity and homogeneity with the other figures.

Answers to reviewer #2 (Emilia Trudnowska):

We (the authors) are thankful for this detailed review and comments which will greatly improve the quality of the manuscript.

Title: This is a good point. We propose “The Green Edge cruise: Investigating the Marginal Ice Zone processes during late spring / early summer to understand the fate of the Arctic phytoplankton bloom.”

Abstract: We have made changes and added more details about our sampling strategies. Abstract now reads as:

“The Green Edge project was designed to investigate the onset, life and fate of a phytoplankton spring bloom (PSB) in the Arctic Ocean. The lengthening of the ice-free period and the warming of seawater, amongst other factors, have induced major changes in Arctic Ocean biology over the last decades. Because the PSB is at the base of the Arctic Ocean food chain, it is crucial to understand how changes in the Arctic environment will affect it. Green Edge was a large multidisciplinary collaborative project bringing researchers and technicians from 28 different institutions in seven countries together, aiming at understanding these changes and their impacts into the future. The fieldwork for the Green Edge project took place over two years (2015 and 2016) and was carried out from both an ice-camp and a research vessel in Baffin Bay, in the Canadian Arctic. This paper describes the sampling strategy and the dataset obtained from the research cruise, which took place aboard the Canadian Coast Guard Ship (CCGS) Amundsen in late spring/early summer 2016. Sampling strategy was designed around the repetitive perpendicular crossing of the marginal ice zone (MIZ), using –not only ship-based station discrete sampling, but also high-resolution measurements from autonomous platforms (Gliders, BGC-Argo floats...) and under-way monitoring systems. The dataset is available at <https://doi.org/10.17882/86417> (Bruyant et al., 2022).”

I.86 Both reviewers made the same comment, and we think this is a great suggestion. We will add a Table containing the list of all papers published using the Green Edge cruise dataset. We added the suggested reference to the text and reference list.

I.119 Thanks. We think OWD is a very useful and powerful tool to decipher the complexity of the MIZ processes.

Table 1– Not mentioning the UVP was definitively a mistake. However, as it was onboard the rosette carousel, we added it in Table 2. LISST was not onboard the Amundsen (it was only on the ice camp). We added the sediment traps in Table 1. This table really was focusing on the systematic ship-based operations, repeatedly executed at EACH one of the station types. Therefore, we did not include in the table the deployments or measurement/equipment used only scarcely during the cruise (e.g. gliders). The complete list of equipment deployed during the cruise is in fact included in Table 3, as the “METHOD” column does list the equipment used. However, to follow the reviewer’s recommendation, we did add the list of sensors included in the IOP and AOP packages in Table 1.

I.133-135 We have removed the sentences related to “what” is an Argo float.

I.152 Header has been modified it now reads: “Time-for-space formatting and data quality control”

I.172 Agreed, we changed the title to “Description of data collection”.

I.176 & others. The list of parameters contained in Table 3 is organized by alphabetical order. We believe this is the easiest way possible to find each parameter if needed. If numbers were added to each of them, it would be the exact same information with no additional value.

I.389 We have modified the sentence for more clarity, it now reads “in case further analysis are needed in the future.”

#### Comments on Figures

Fig. 6: Indeed, the black line represents the ship route. The caption has been modified to include this information.

Fig. 10: The word “microbial taxa” has been added to the figure caption to improve clarity.

Fig. 15: This is a great suggestion. We believe it will help to understand the complexity of the Arctic Ocean system and help visualize the extent of the Green Edge study. Fig. 15 will be added as panel B to Fig. 2.

#### Comments about dataset.

1. Over the construction of this publication, we had several troubles due mostly to our lack of experience in data/DOI publication. The first data description paper –published by Massicotte et al. in 2020 on the Green-Edge ice camp [<https://doi.org/10.5194/essd-12-151-2020>] was accompanied by a first dataset containing all the ice camp data, and some of the Amundsen cruise data (the bulk that was ready and processed at the time) [<https://doi.org/10.17882/59892>]. The reason for that is that we weren’t aware a DOI could not be modified, consequently the plan was

to add the rest of the cruise data to the same Massicotte et al. DOI on SEANOE. As soon as I sent the cruise paper for publication to ESSD, I was immediately contacted by editor Dave Carlson about the confusion. We had a meeting (editor D. Carlson, editor K. Elger, P. Massicotte and F. Bruyant) and it was decided that the easiest solution would be to create an entirely separated dataset containing ONLY the cruise data with its own DOI [<https://doi.org/10.17882/86417>] in order to accompany the present paper [essd-2022-41]. The full dataset of Green Edge ice camp data remains unchanged as mentioned in Editor's comment 1 dated March 8<sup>th</sup>, 2022. Furthermore, the cruise data set was momentarily published on the SEANOE website with a publication date as "2016". It has now been corrected for "2022". We have taken the appropriate steps towards appropriate citations of both datasets and both papers in the new version of the paper. We apologize for the confusion, and we hope it is now clarified. In the meantime, I have requested the LEFE CYBER website to host the entire raw data of both Green Edge Ice-Camp and cruise, be accessible without password. We will also –as stated in the response to reviewer #1 add a column to Table 3 to indicate where each parameter is to be found. We will also list all storage addresses in the "data availability statement".
